# Supplementary material
Source: Springer Nature journal article supplement (https://www.springermedizin.de/resource/supplementary/12958_2013_1228_MOESM2_ESM.pdf/9567092)

## Low-dose protocol

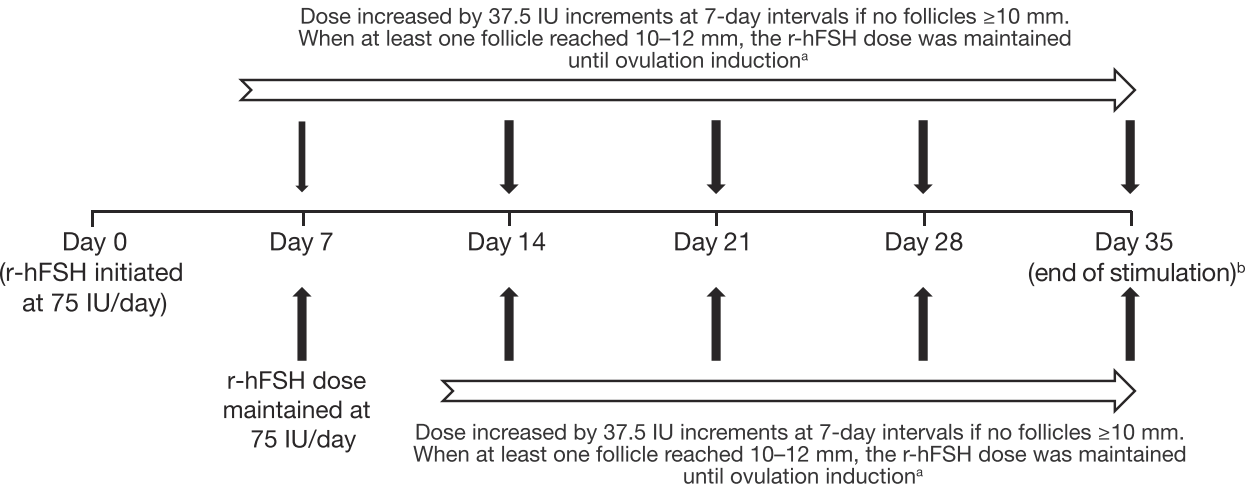

## Chronic low-dose protocol

Supplement: MOESM2 [file 9567092]
